# Supplementary material for: Gcn5p and Ubp8p Affect Protein Ubiquitylation and Cell Proliferation by Altering the Fermentative/Respiratory Flux Balance in Saccharomyces cerevisiae
Source: PubMed Central journal article supplement (PMC7439465; doi:10.1128/mbio.01504-20), 2020-08-11

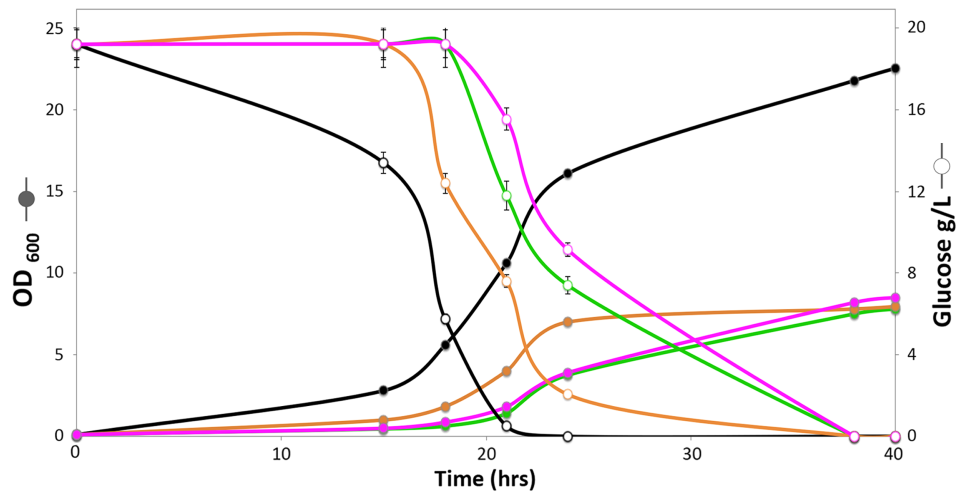

Supplement: mBio.01504-20-sf001.pdf [file mBio.01504-20-sf001.pdf]
